# Supplementary material
Source: PubMed Central journal article supplement (PMC6995768)
Supplement: NIHMS1531730-supplement-4.pdf [file NIHMS1531730-supplement-4.pdf]

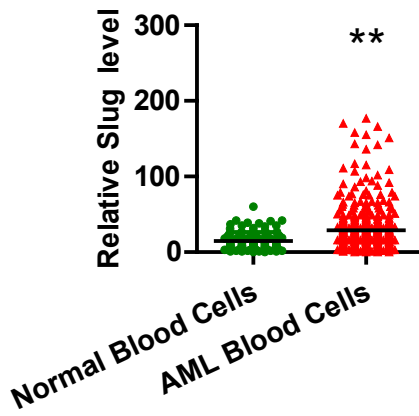

**Supplemental Figure 1. The expression of SLUG between normal hematopoietic cells of healthy controls and AML blasts and mononuclear cells of patients.** The data were obtained from a public microarray database Gene Expression Omnibus (GSE1159, GSE7638, GSE3365, GSE12417, and GSE1140) (normal samples  $n = 107$ , AML samples  $n = 456$ ). All data are represented as mean  $\pm$  SD. Two-tailed Student's  $t$ -tests were used to assess statistical significance (\*\*  $P < 0.01$ ).

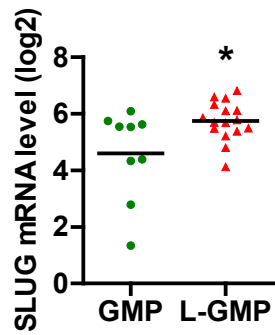

**Supplemental Figure 2. The expression of SLUG between normal GMPs and AML patients' L-GMPs** (normal patient, n = 9; AML patient n = 16). All data are represented as mean  $\pm$  SD. Two-tailed Student's *t*-tests were used to assess statistical significance (\*  $P < 0.05$ ).

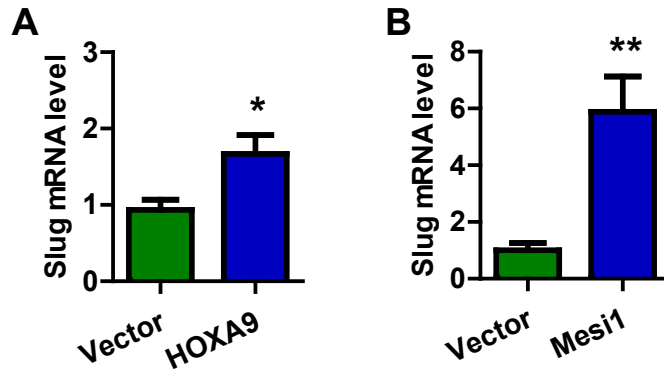

**Supplemental Figure 3. qPCR analysis of the expression of endogenous *Slug* in mouse HSPCs transduced with retroviral vector only or retrovirus expressing HoxA9 (A), or Mesi1 (B) oncogene. Results are normalized to *Gapdh* expression and expressed relative to *Slug* expression in vector group (n = 3).**

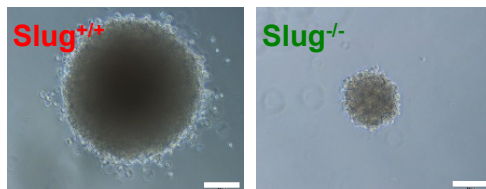

**Supplemental Figure 4. Colony morphology of *Slug*<sup>+/+</sup> or *Slug*<sup>-/-</sup> AML cells at passage 3 (scale bar = 100  $\mu$ m).**

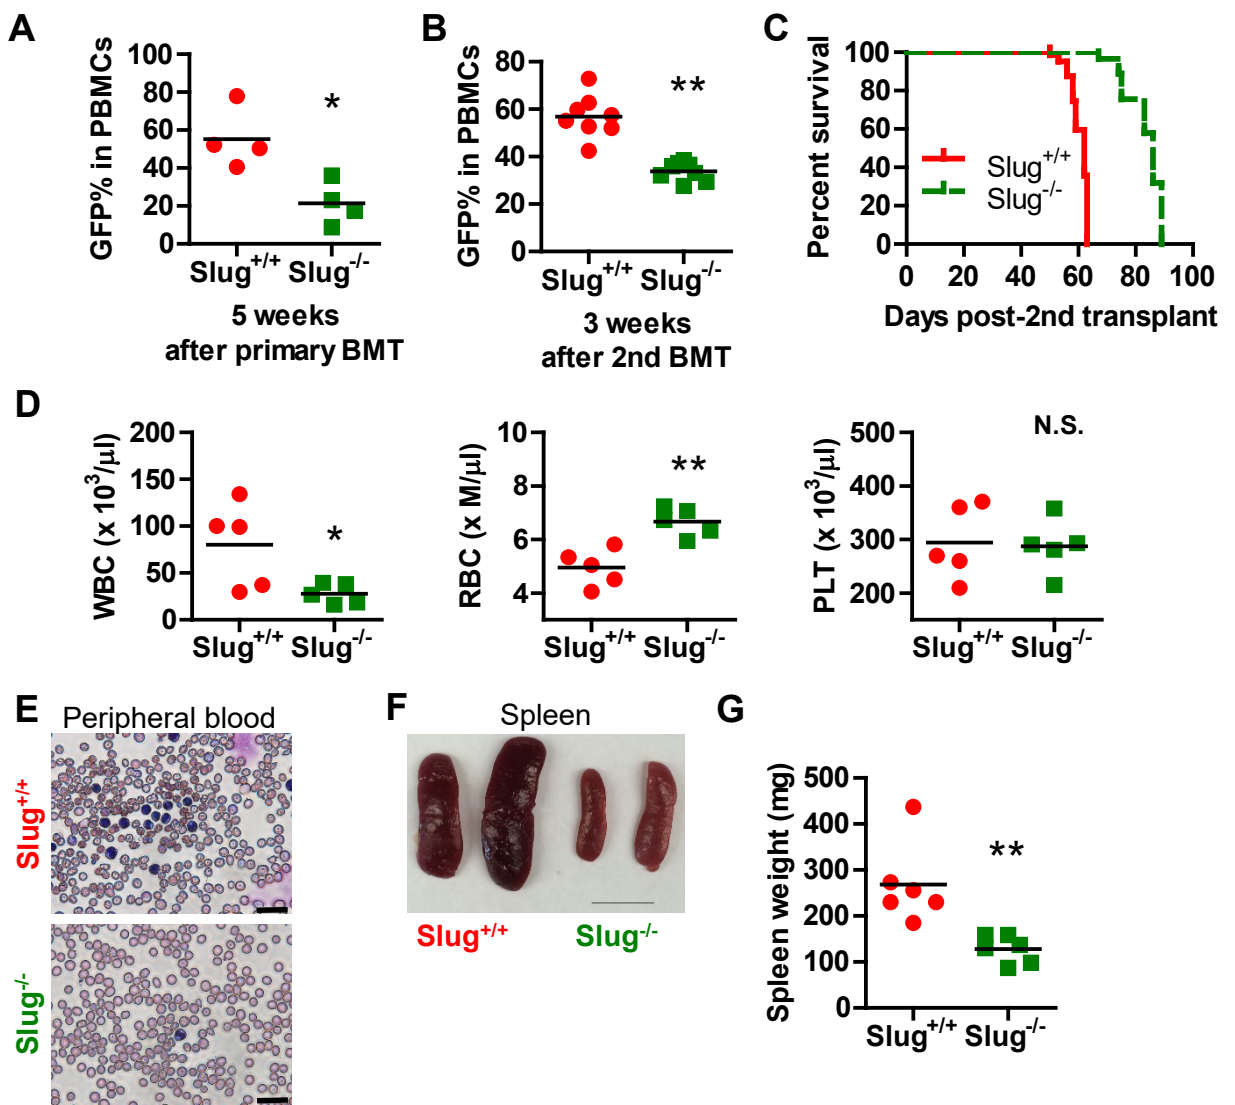

**Supplemental Figure 5. Phenotype analysis in MLL-AF9 derived AML mice.**

- (A) GFP percentage in peripheral blood at week 5 after primary BMT with 1X10<sup>3</sup> AML cells (n = 4).
- (B) GFP percentage in peripheral blood at week 3 after secondary transplantation (n = 8).
- (C) Survival analysis of secondary recipient mice. Median survival was 62 versus 86 days post-transplant for secondary recipients of *Slug*<sup>+/+</sup> or *Slug*<sup>-/-</sup> AML cells (5X10<sup>5</sup> AML GFP<sup>+</sup> cells injected), respectively (*P* < 0.01, Mantel-Cox test; n = 10).
- (D) Complete blood count (CBC) analysis of peripheral blood in the secondary recipients injected with 5X10<sup>4</sup> *Slug*<sup>+/+</sup> or *Slug*<sup>-/-</sup> AML cells at week 7 post-transplantation (n = 5).
- (E) Representative peripheral blood smear stained by Wright-Giemsa (scale bar = 20 μm).
- (F) Spleen morphology from the secondary recipients injected with 5X10<sup>4</sup> *Slug*<sup>+/+</sup> or *Slug*<sup>-/-</sup> AML cells at week 7 post-transplantation (scale bar = 1 cm).
- (G) Spleen weight from secondary recipients of *Slug*<sup>+/+</sup> or *Slug*<sup>-/-</sup> AML cells 49 days posttransplant (n = 6).

Data are representative of two to three independent experiments. All data are represented as mean ± SD. Two-tailed Student's *t*-tests were used to assess statistical significance ( \**P* < 0.05; \*\* *P* < 0.01; N.S, no significance).

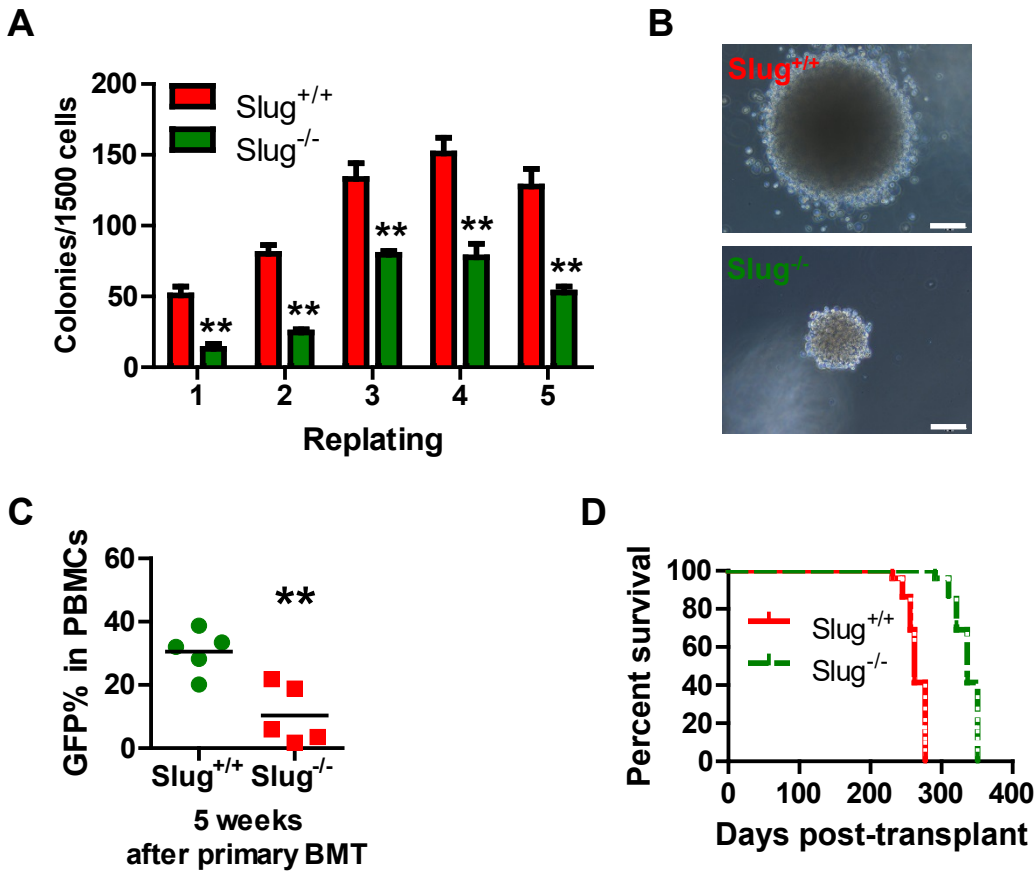

**Supplemental Figure 6. Phenotype analysis in NUP98-HoxA9 derived AML mice.**

(A) Colony-forming assay of *Slug*<sup>+/+</sup> or *Slug*<sup>-/-</sup> AML cells (n = 3).

(B) Colony morphology of *Slug*<sup>+/+</sup> or *Slug*<sup>-/-</sup> AML cells at passage 3 (scale bar = 100 μm)..

(C) GFP percentage in peripheral blood at week 5 after primary BMT (n = 5).

(D) Survival analysis of primary recipient mice. Median survival was 262 versus 336 days post-transplant for primary recipients of *Slug*<sup>+/+</sup> or *Slug*<sup>-/-</sup> AML cells, respectively ( $P < 0.01$ , Mantel-Cox test; n = 5).

Data are representative of three independent experiments. All data are represented as mean ± SD. Two-tailed Student's *t*-tests were used to assess statistical significance ( \* $P < 0.05$ ; \*\*  $P < 0.01$ ; N.S, no significance).

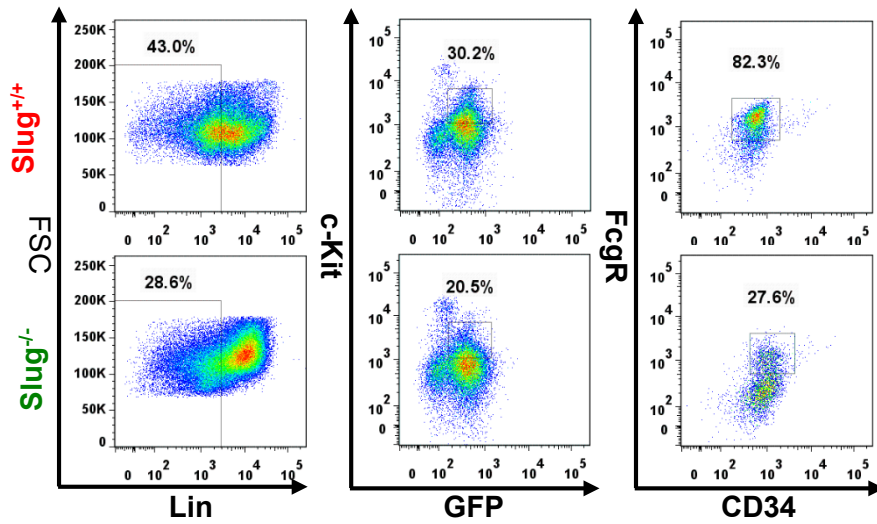

**Supplemental Figure 7. Representative flow cytometry analysis of L-GMP in the BM.** BM were isolated from secondary recipients injected with  $5 \times 10^4$  *Slug*<sup>+/+</sup> or *Slug*<sup>-/-</sup> AML cells at week 7 post-transplantation.

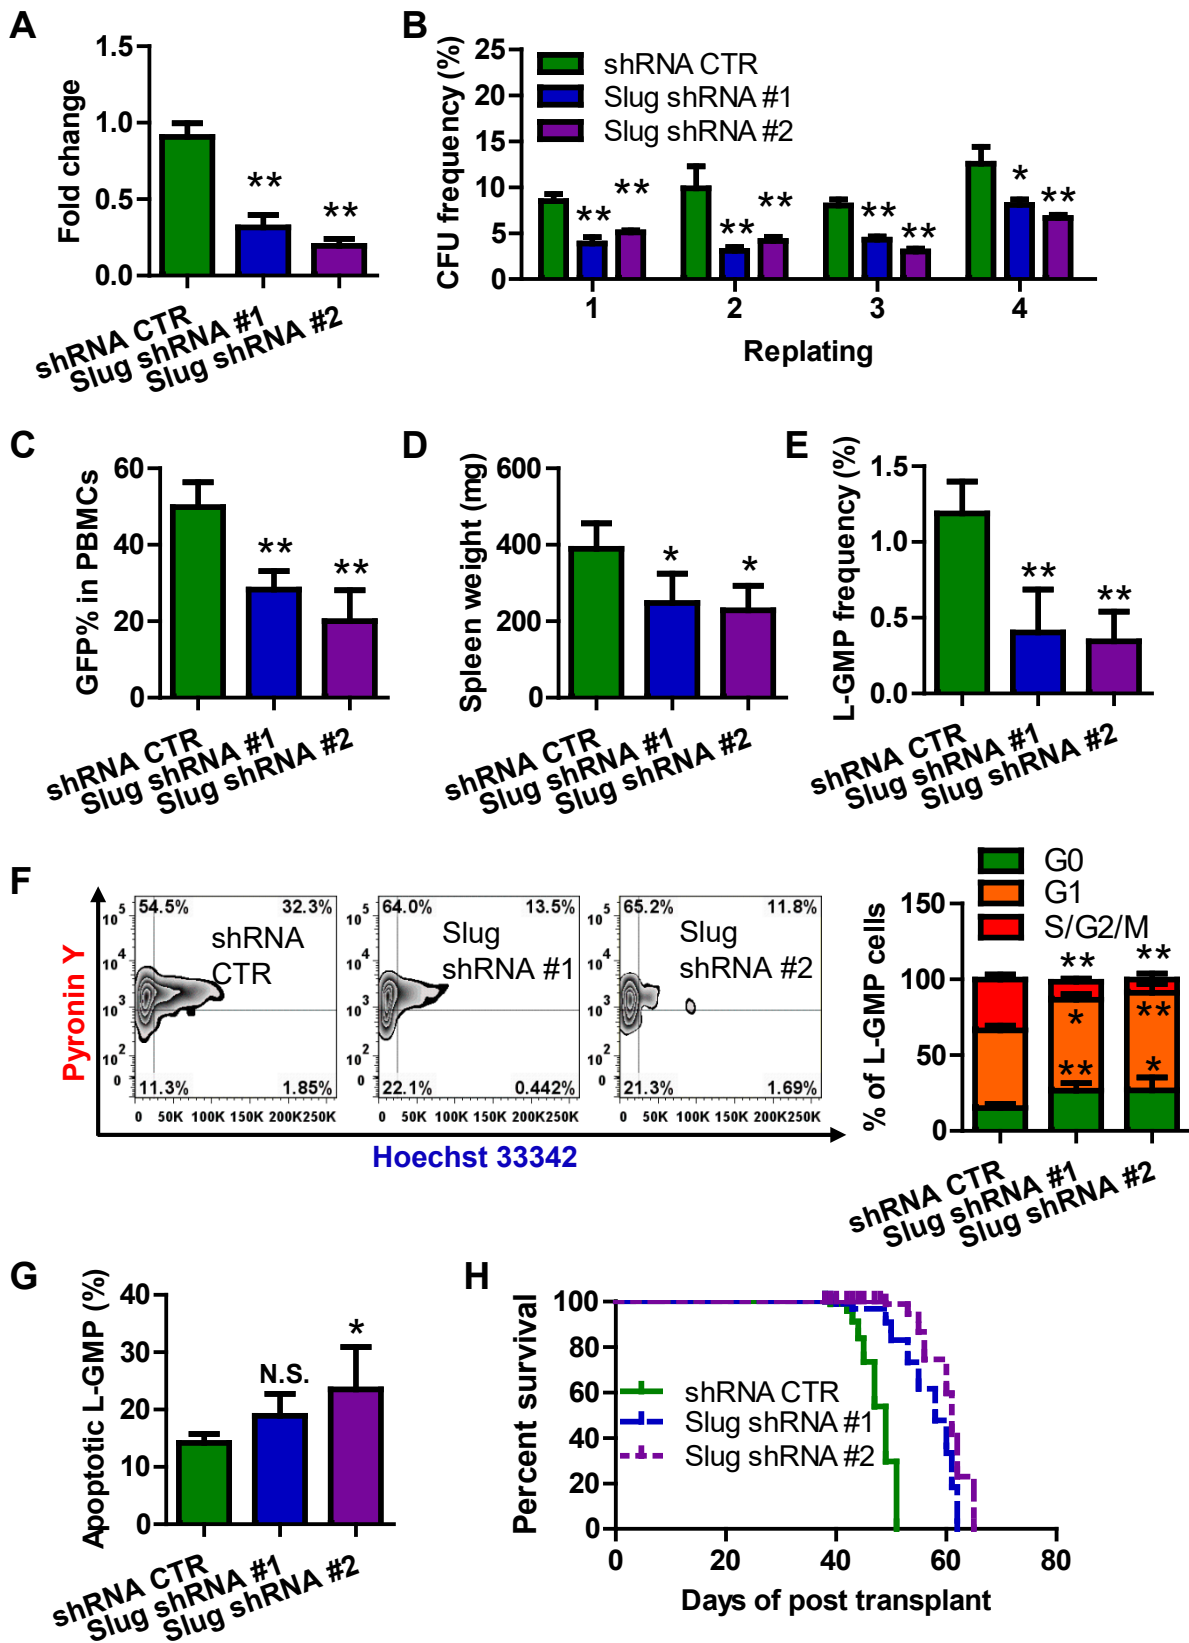

Supplemental Figure 8



**Supplemental Figure 8. Knockdown of endogenous *Slug* suppresses self-renewal of L-GMP.**

(A) qPCR analysis of *Slug* knockdown in L-GMP cells (n = 3).

(B) Colony-forming assay of AML cells by knockdown of endogenous *Slug* (n = 3).

(C) GFP percentage in peripheral blood at week 3 after transplantation with  $1 \times 10^5$  AML cells (n = 9).

(D) Spleen weight from the recipients of at week 3 post-transplantation (n = 4).

(E) Percentage of apoptotic L-GMP cells in the BM from recipients injected with AML cells at week 3 post-transplantation (n = 4).

(F) Quantification of L-GMP in the BM from recipients at week 3 post-transplantation (n = 4). The recipient mice were injected with  $1 \times 10^5$  AML cells infected by shRNA CTR, *Slug* shRNA #1, and *Slug* shRNA #2, respectively.

(G) Cell cycle phase distribution of L-GMP cells in BM from recipients injected with AML cells at week 3 post-transplantation (n = 4).

(H) Median survival was 49 versus 58 and 61 days post-transplant for recipients of  $1 \times 10^5$  AML cells infected by shRNA CTR, *Slug* shRNA #1 and *Slug* shRNA #2, respectively ( $P < 0.01$ , Mantel-Cox test; n = 10).

Data are representative of two to three independent experiments. All data are represented as mean  $\pm$  SD. Two-tailed Student's *t*-tests were used to assess statistical significance (\*  $P < 0.05$ ; \*\*  $P < 0.01$ ; N.S, no significance).

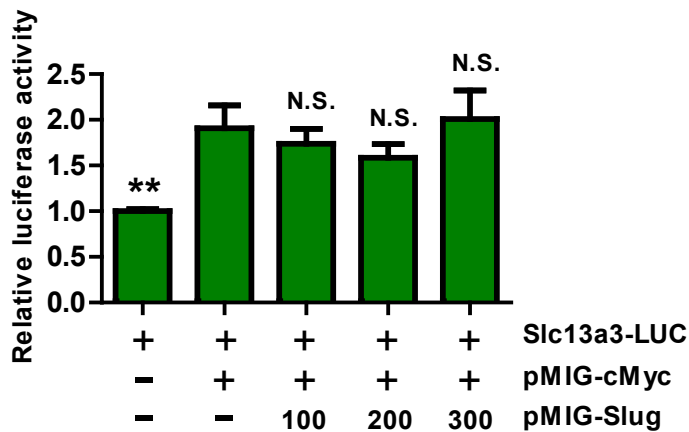

**Supplemental Figure 9. Slc13a3 luciferase reporter assays.** 293T cells were transfected with Slc13a3-Luc together with 400 ng of pMIG (vector control), or pMIG-cMyc with different dose of pMIG-Slug (100, 200, or 300 ng), then cultured for 72 h before luciferase activity assay. 50 ng of pCMV-LacZ was included in each transfection as an internal control to normalized luciferase activity (n = 3). Data are representative of two independent experiments. All data are represented as mean  $\pm$  SD. Two-tailed Student's t-tests were used to assess statistical significance (\*\*  $P < 0.01$ ; N.S., not significant).

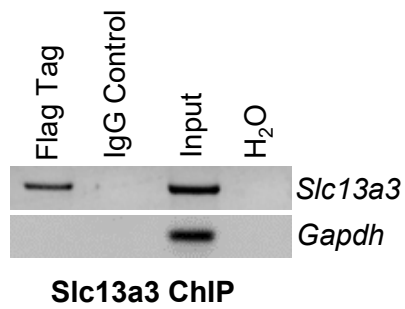

**Supplemental Figure 10. Analysis of *Slug* occupancy at the *Slc13a3* promoter by ChIP assay.** PCR results were repeated three times.

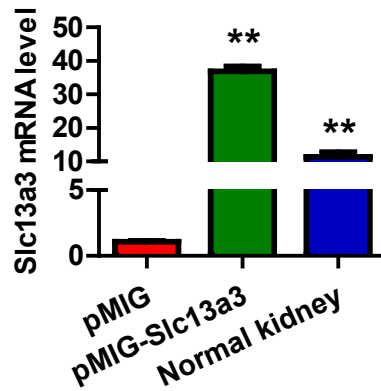

**Supplemental Figure 11. qPCR analysis of the expression of *Slc13a3* in mouse LSCs transduced with retroviral vector only or retrovirus expressing *Slc13a3* and normal mouse kidney tissue.** Results are normalized to *Hprt* expression and expressed relative to *Slc13a3* expression in vector group (n = 3). Data are representative of two independent experiments. All data are represented as mean  $\pm$  SD. Two-tailed Student's t-tests were used to assess statistical significance (\*\*  $P < 0.01$ ).

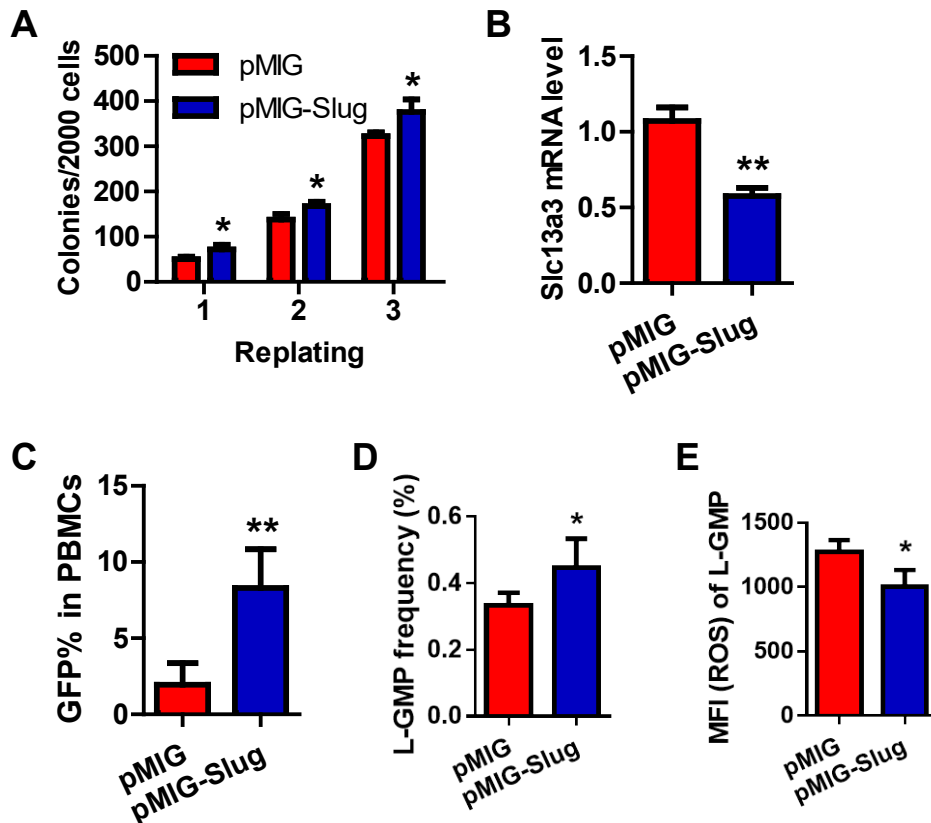

**Supplemental Figure 12. Forced-expression of *Slug* enhances self-renewal of L-GMP.**

(A) Colony-forming assay of MLL-AF9-driven AML cells by overexpression of *Slug* (n = 3).

(B) qPCR analysis of *Slc13a3* expression in MLL-AF9-driven AML cells infected with retroviral vector pMIG and pMIG-*Slug*, respectively (n = 3).

(C) GFP percentage in peripheral blood at week 2 after transplantation with  $5 \times 10^4$  AML cells infected with retroviral vector pMIG and pMIG-*Slug*, respectively (n = 6).

(D) Frequency of L-GMP in the BM from primary recipients injected with  $5 \times 10^4$  AML cells infected with retroviral vector pMIG and pMIG-*Slug*, respectively, at week 2 post-transplantation (n = 5).

(E) Flow cytometric analysis of ROS levels in L-GMPs from recipient mice injected with  $5 \times 10^4$  AML cells carrying pMIG vector and pMIG-*Slug*, respectively. Levels of ROS were evaluated by flow cytometry. MFI, median fluorescence intensity (n = 4)

Data are representative of two to three independent experiments. All data are represented as mean  $\pm$  SD. Two-tailed Student's t-tests were used to assess statistical significance ( $* P < 0.05$ ;  $** P < 0.01$ ).

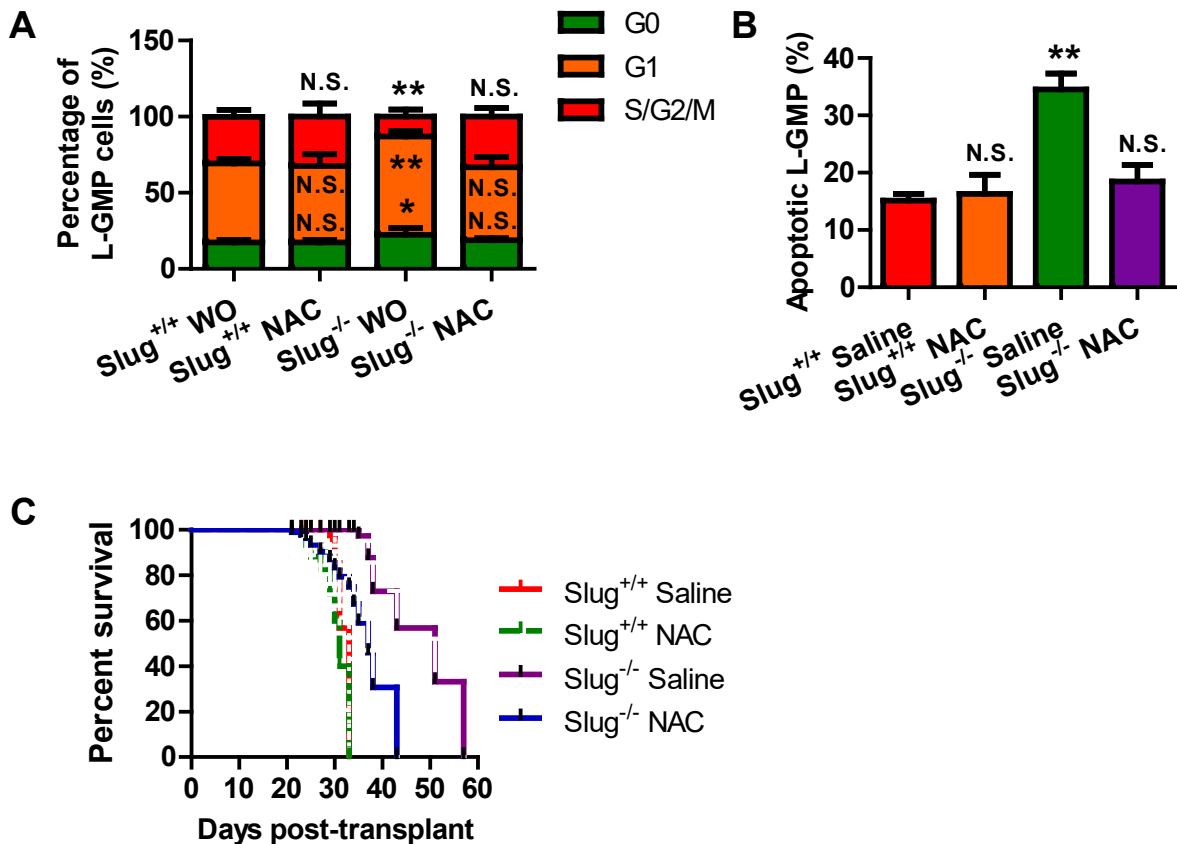

**Supplemental Figure 13. Administration of NAC impairs the functions of Slug on MLL-AF9-derived L-GMPs.**

(A) Cell cycle phase distribution of L-GMP cells in BM from recipients injected with AML cells of *Slug*<sup>+/+</sup> and *Slug*<sup>-/-</sup> mice and then treated with saline or NAC (n= 5)

(B) Percentage of apoptotic L-GMP cells in the BM from recipients injected with AML cells of pMIG or pMIG-Slc13a3 and then treated with saline or NAC (n= 4).

(C) Survival analysis of *Slug*<sup>+/+</sup>- or *Slug*<sup>-/-</sup>-AML recipient mice with saline or NAC treatment. Median survival was 33, 31, 51, and 37 days post-transplant for *Slug*<sup>+/+</sup>- or *Slug*<sup>-/-</sup>-AML recipients treated with saline or NAC, respectively ( $P < 0.05$ , Mantel-Cox test; n = 6).

Data are representative of three independent experiments. Excluding survival analysis, all data are represented as mean  $\pm$  SD. Two-tailed Student's t-tests were used to assess statistical significance (\*  $P < 0.05$ ; \*\*  $P < 0.01$ ; N.S, no significance).

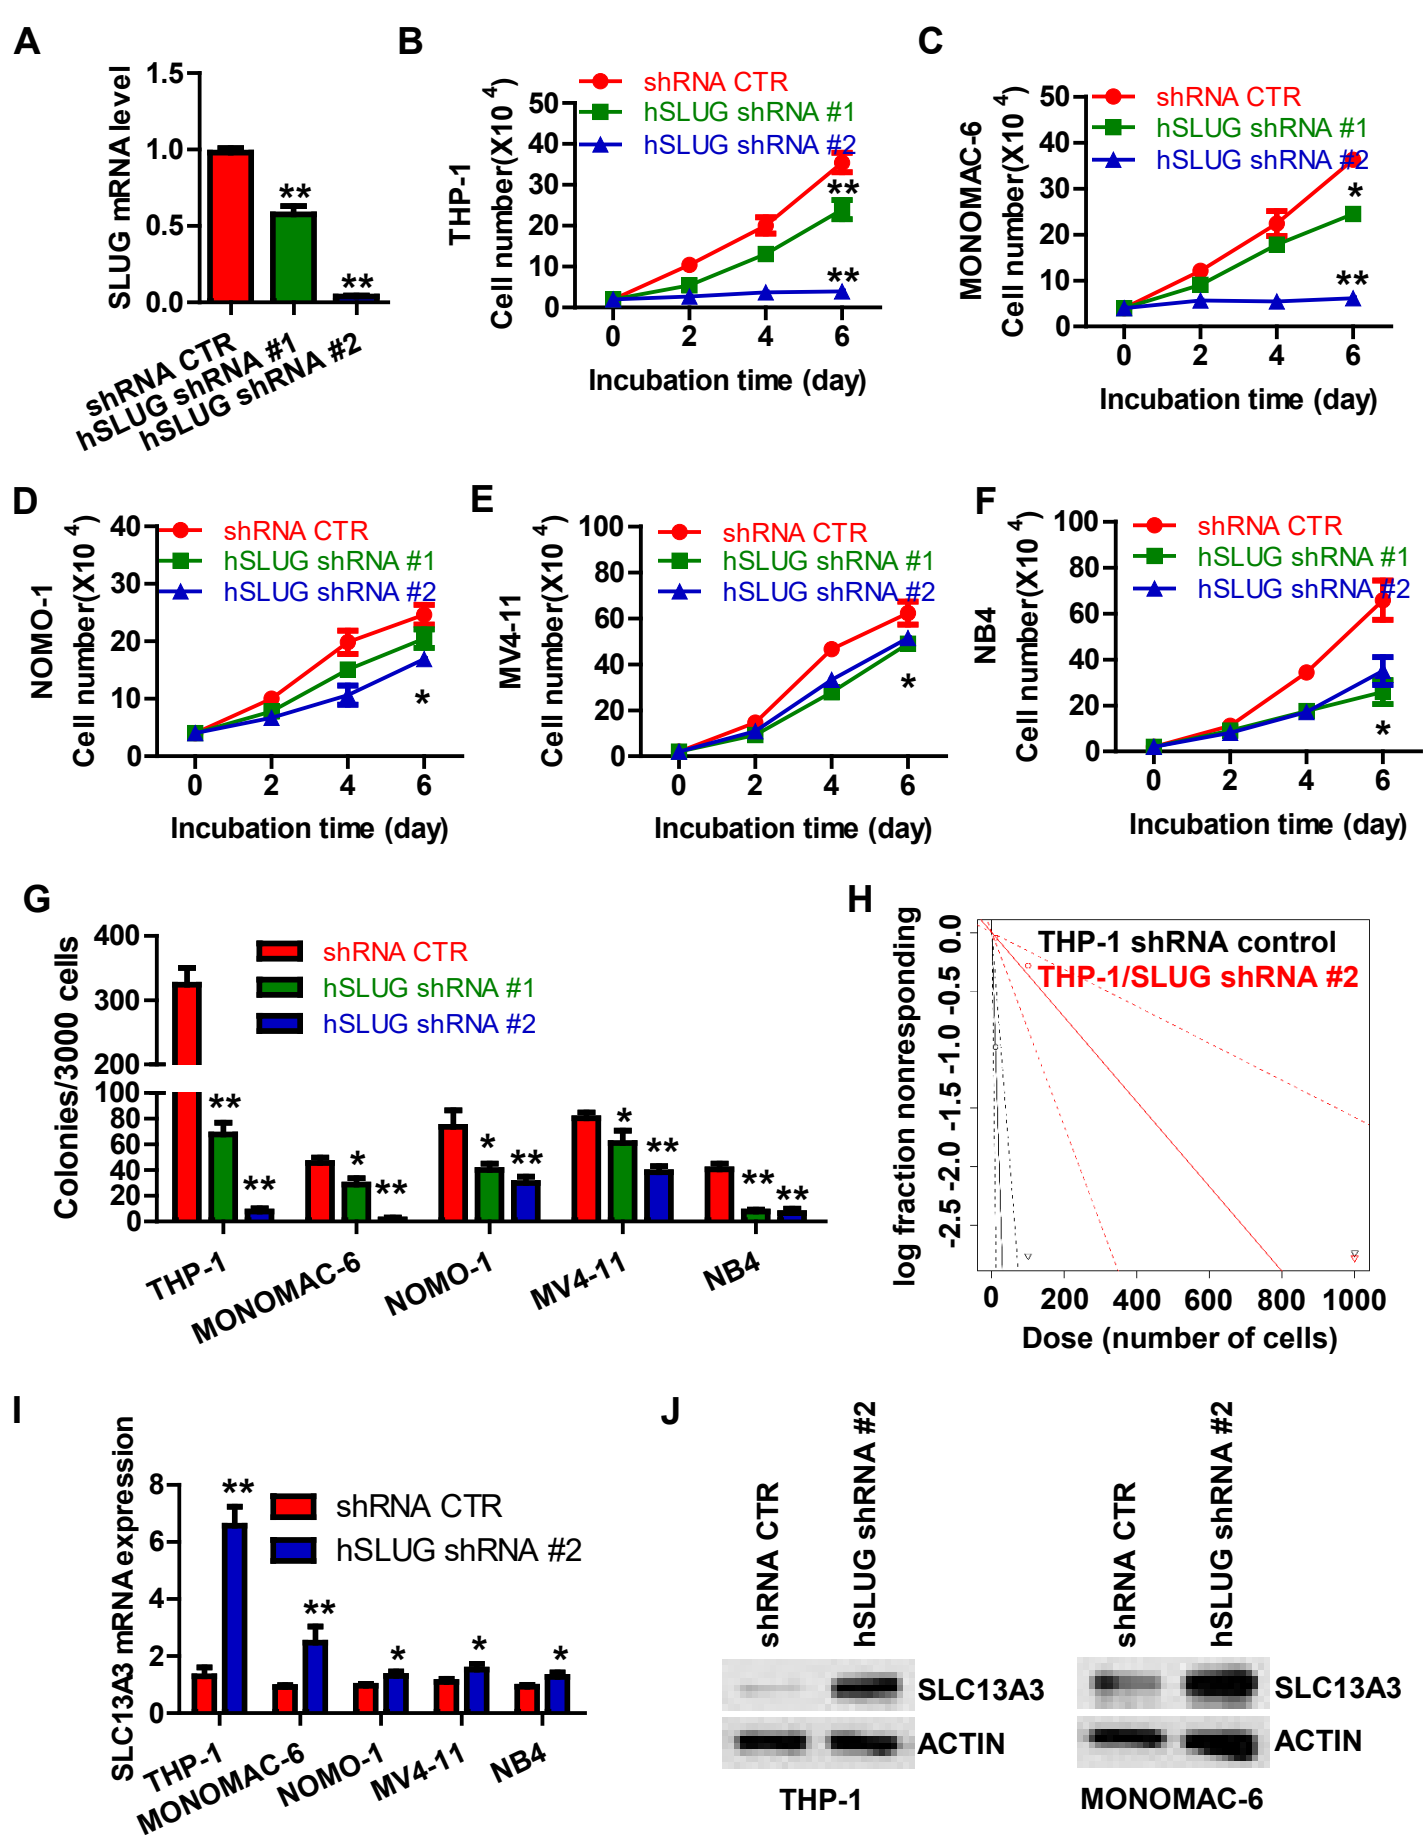

Supplemental Figure 14

### **Supplemental Figure 14. Knockdown of SLUG impairs human AML cells.**

**(A)** qPCR analysis of SLUG inducible knockdown in THP-1 cells. THP-1 cells were transduced with lentiviruses containing inducible scramble shRNA (CTR) or hSLUG shRNAs. After puromycin selection, 1 µg/ml of doxycycline were added into medium for 48 hrs.

**(B-F)** Inducible knockdown of endogenous SLUG suppresses the growths of THP-1 (B), NOMOMAC-6 (C), NOMO-1 (D), MV4-11 (E), and NB4 (F) cells (n = 3).

**(G)** Colony-forming assay of human leukemia cells by inducible knockdown of endogenous SLUG. (n = 3).

**(H)** Limiting dilution assay of THP-1 cells infected with control shRNA and SLUG shRNA #2. LSC/LICs frequencies calculated by ELDA software (n = 8).

**(I)** qPCR analysis of the expression level of *SLC13A3* in human AML cells transduced with Scramble shRNA (shRNA CTR) or hSLUG shRNA #2. Results are normalized to *HPRT* expression and expressed relative to *SLC13A3* expression in shRNA CTR group (n = 3).

**(J)** Western blotting analysis of protein level of *SLC13A3* in THP-1 and MONOMAC-6 transduced with scramble shRNA (shRNA CTR) or hSLUG shRNA #2.

Data are representative of two to three independent experiments. All data are represented as mean  $\pm$  SD. Two-tailed Student's t-tests were used to assess statistical significance (\* P < 0.05; \*\* P < 0.01).



Control peptide (TAT-GS-HA): YGRKKRRQRRRGSYPYDVPDYA

SNAG peptide (TAT-GS-HA-SNAG): YGRKKRRQRRRGSYPYDVPDYAMP RSFLVKK

Supplemental Figure 15. The peptide sequences of control peptide and SNAG peptide.

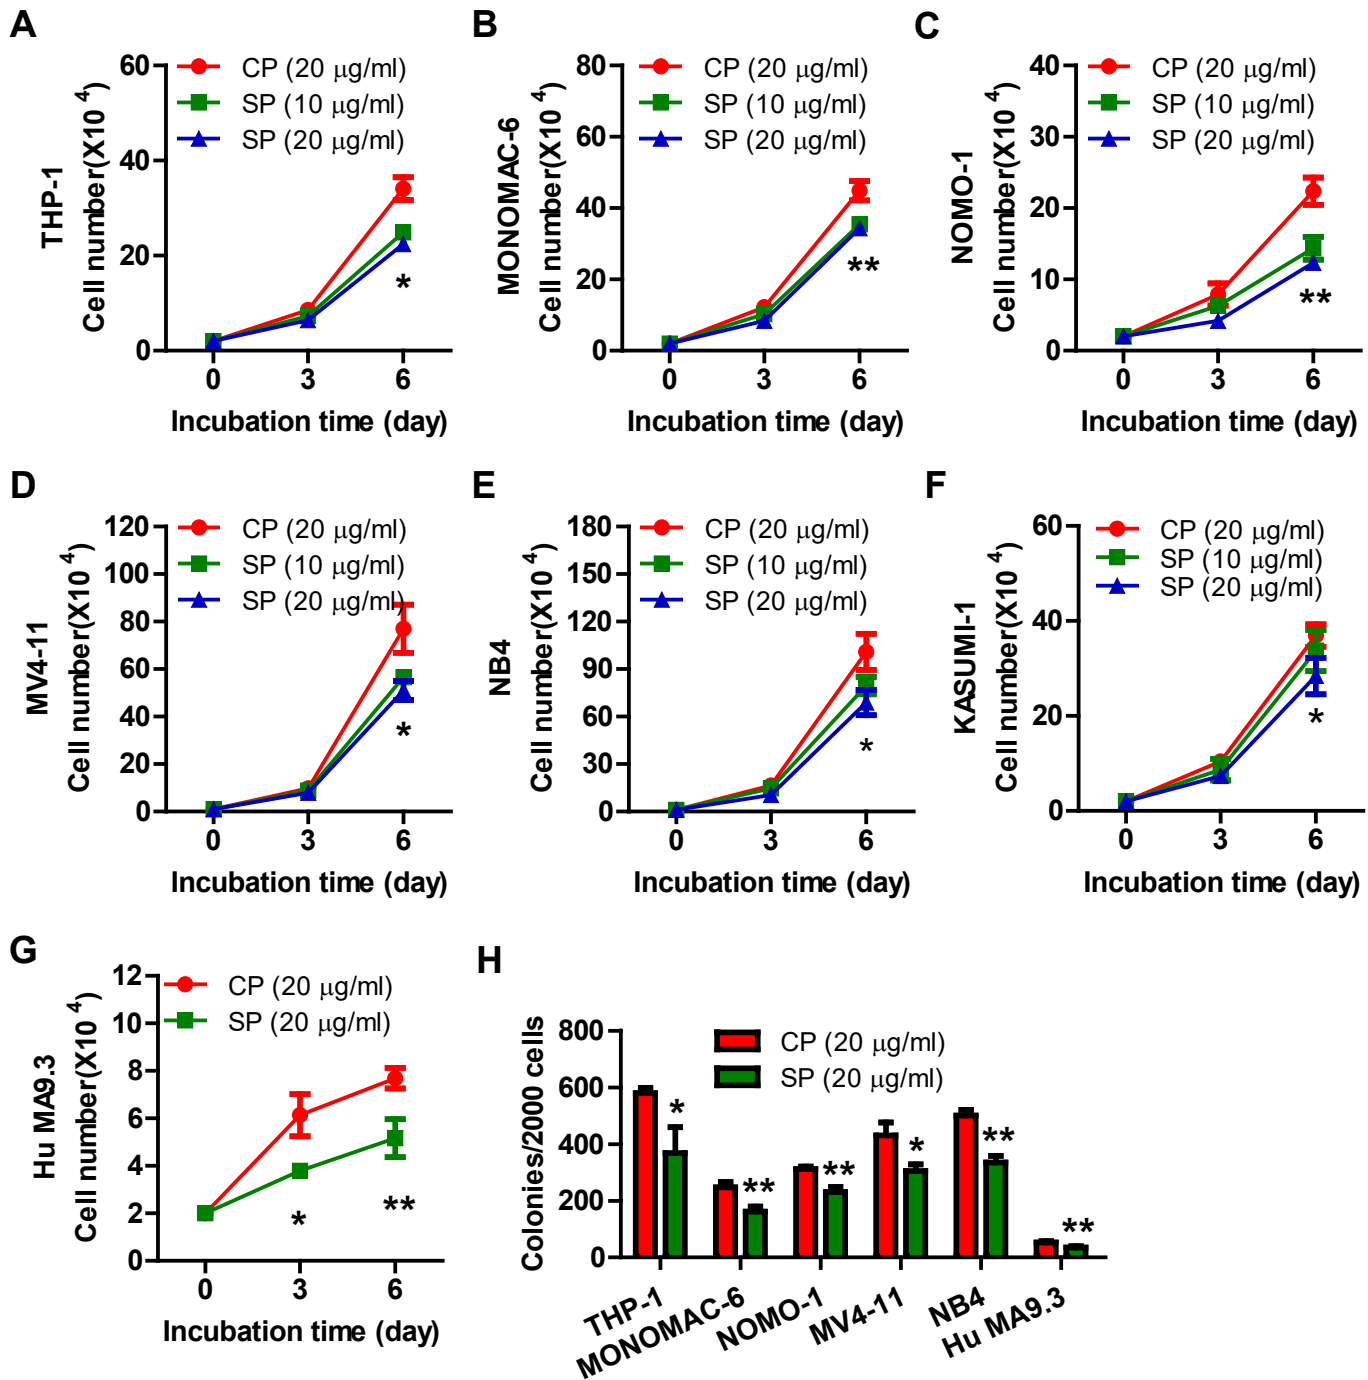

**Supplemental Figure 16. Pharmacological targeting of SLUG by TAT-SNAG peptide inhibits human AML cell growth.**

(A-G) The proliferation/cell growth of human AML cells. The cells were cultured in RPMI1640 or IMDM containing 10% fetal bovine serum treated with or without TAT-SNAG peptide. The cell number was counted at different time points (n = 3). (A) THP-1, (B) NOMO-1, (C) NOMOMAC-6, (D) NB4, (E) MV4-11, (F) KASUMI-1, and (G) Hu MA9.3.

(H) Colony-forming assay of human leukemic cells (n = 3).

Data are representative of two to three independent experiments. All data are represented as mean  $\pm$  SD. Two-tailed Student's t-tests were used to assess statistical significance (\*  $P < 0.05$ ; \*\*  $P < 0.01$ ).

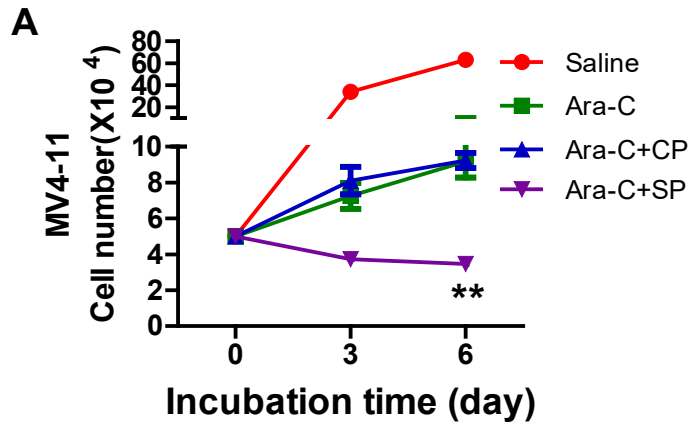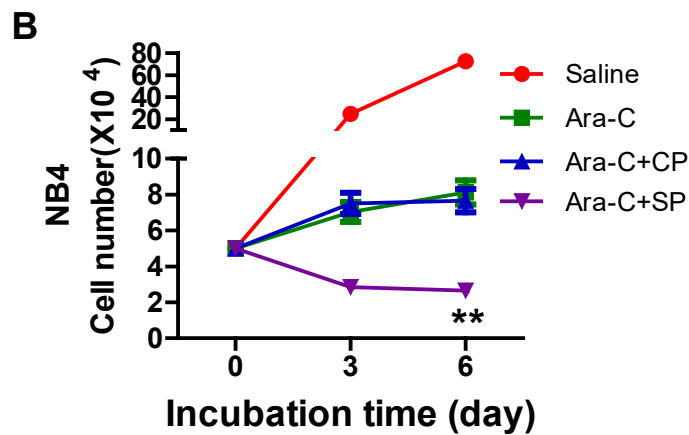

**Supplemental Figure 17. Enhancement of the cytotoxic effects of cytarabine in synergism with TAT-SNAG peptide in human AML cell line MV4-11 (A) and NB4 (B).** The cells were cultured in RPMI1640 containing 10% fetal bovine serum treated with saline, cytarabine, combination of cytarabine and TAT-control peptide, or combination of cytarabine and TAT-SNAG peptide. The cell number was counted at different time points ( $n = 3$ ). Data are representative of three independent experiments. All data are represented as mean  $\pm$  SD. Two-tailed Student's t-tests were used to assess statistical significance (\*  $P < 0.05$ ; \*\*  $P < 0.01$ ).

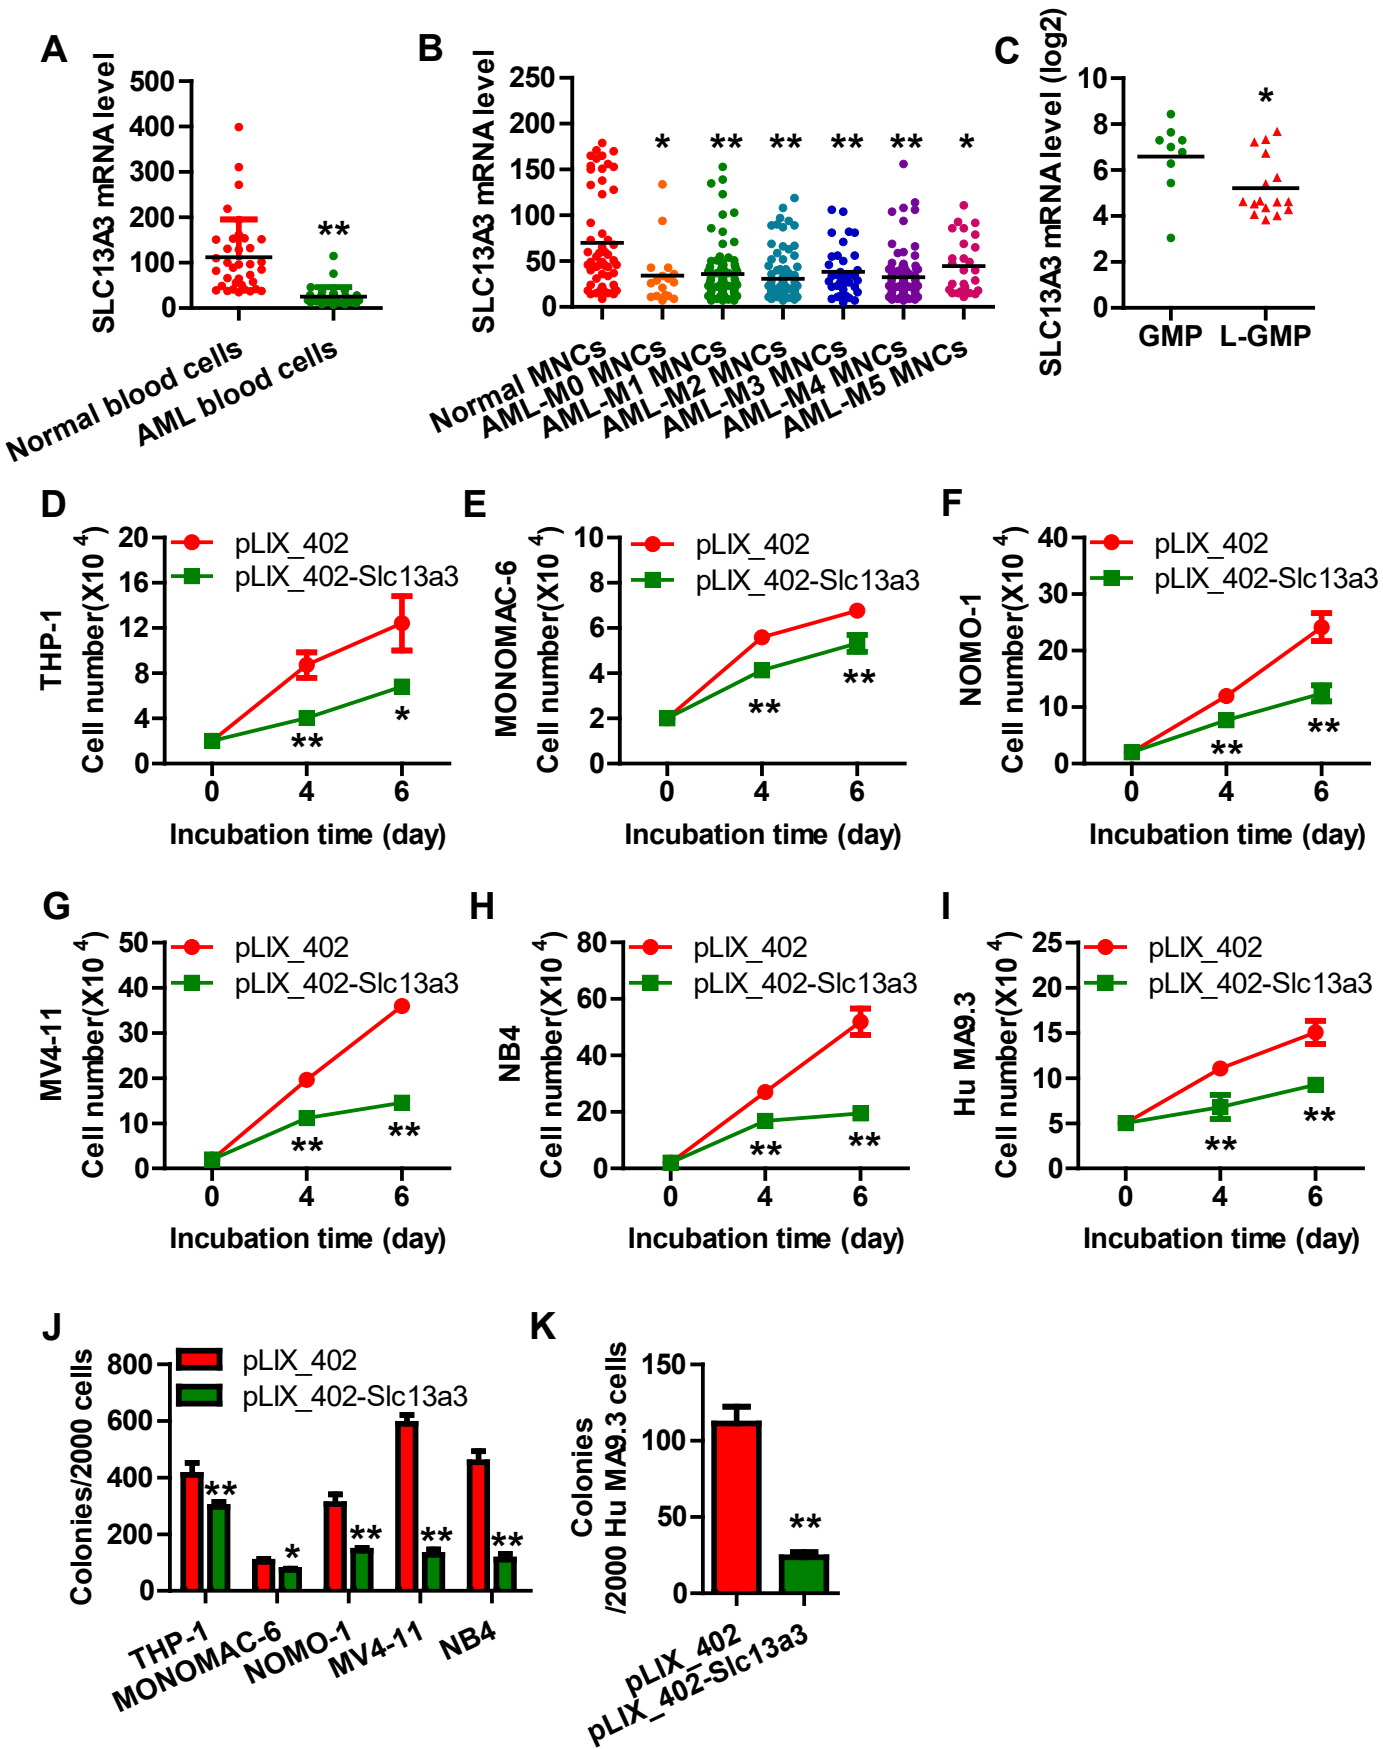

Supplemental Figure 18

**Supplemental Figure 18. Forced-expression of SLC13A3 suppresses human AML cell growth.**

(A) The expression of SLUG between normal hematopoietic cells of healthy controls and AML blasts and mononuclear cells of patients. The data were obtained from a public microarray database (GSE6613, GSE1751, and GSE8970) (normal samples  $n = 36$ , AML samples  $n = 34$ ).

(B) The expression of SLUG between normal BM cells of healthy controls and FAB subtypes of AML patients. The data were obtained from a public microarray database (GSE3365, GSE12417 and GSE10358) (normal patient,  $n = 57$ ; M0 patient  $n = 17$ ; M1 patient  $n = 80$ ; M2 patient  $n = 89$ ; M3 patient  $n = 36$ ; M4 patient  $n = 87$ ; M5 patient  $n = 27$ ).

(C) The expression of SLUG between normal GMPs and AML patients' L-GMPs (normal patient,  $n = 9$ ; AML patient  $n = 16$ ).

(D-I) The proliferation/cell growth of human AML cells. Human AML cells were transduced with lentiviral particles and then performed puromycin selection. The cell number was counted at different time points ( $n = 3$ ). (D) THP-1, (E) NOMOMAC-6, (F) NOMO-1, (G) MV4-11, (H) NB4, (I) Hu MA9.3 ( $n = 3$ ).

(J, K) Colony-forming assay of human leukemic cells ( $n = 3$ ).

Data are representative of three independent experiments. All data are represented as mean  $\pm$  SD. Two-tailed Student's t-tests were used to assess statistical significance (\*  $P < 0.05$ ; \*\*  $P < 0.01$ ).

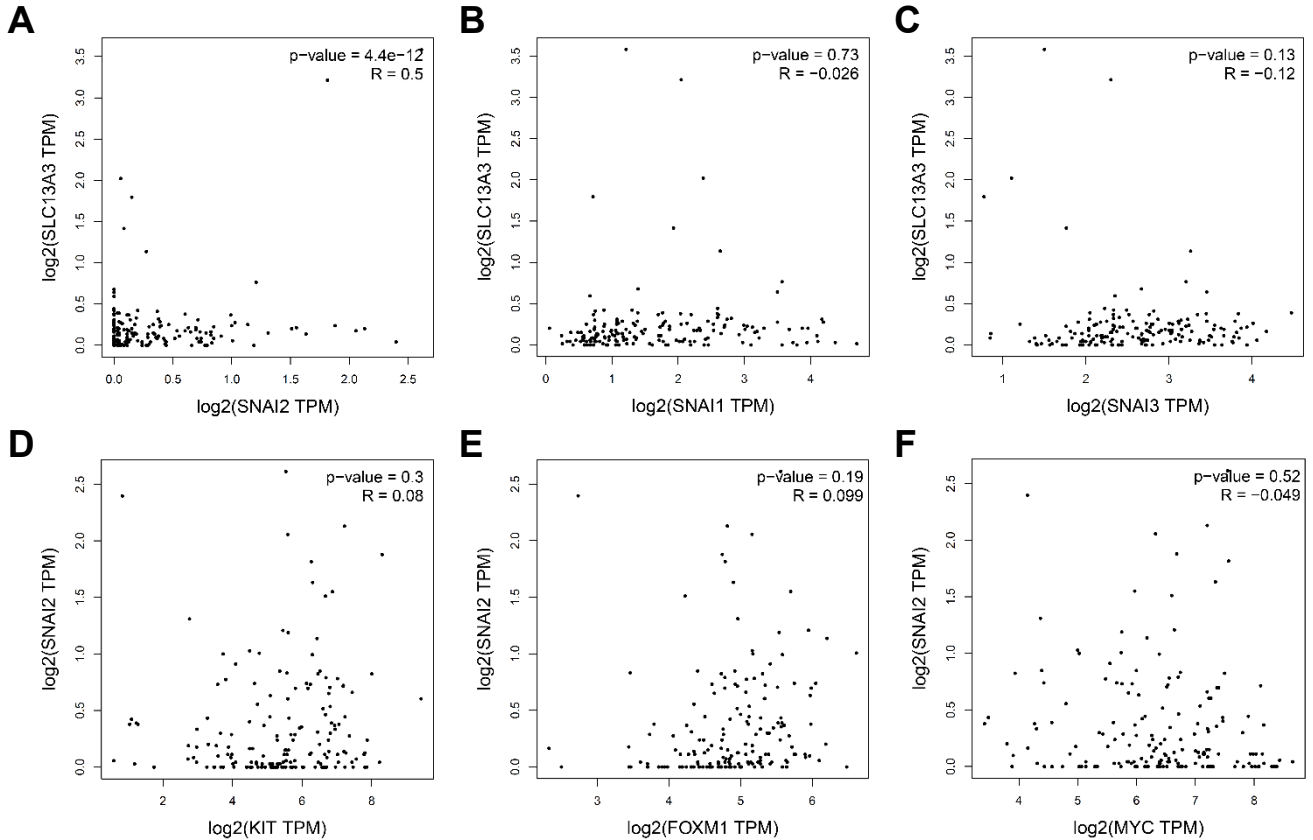

**Supplemental Figure 19. The analysis of gene correlation in samples from human patients with AML.**

**(A-C)** Correlation analysis of expression of SLC13A3 with SLUG/SNAI2 (A), SNAI1 (B), SNAI3 (C), respectively. Expression levels were expressed in transcripts per million (TPM) ( $n = 173$ ).

**(D-F)** Correlation analysis of expression SLUG/SNAI2 with KIT (A), FOXM1 (B), and c-MYC (C), respectively ( $n = 173$ ).

Data are analyzed by online software GEPIA (<http://gepia.cancer-pku.cn/detail.php>).  $P$  values and  $R$  values are indicated.

**Supplemental Table 3. List of primers for PCR**

| <b>Primer</b> | <b>Sequence (5' to 3')</b>                                 | <b>Application</b> |
|---------------|------------------------------------------------------------|--------------------|
| SLUG-sh1-F1   | ccggCAGCTGTAAATACTGTGACAActcgagTTGTCACAGTATTTACAGCTGTTTTTG | shRNA              |
| SLUG-sh1-R1   | aattcaaaaaCAGCTGTAAATACTGTGACAActcgagTTGTCACAGTATTTACAGCTG | shRNA              |
| SLUG-sh2-F2   | ccggGCCAAATCATTTCAACTGAAActcgagTTTCAGTTGAAATGATTTGGCTTTTTG | shRNA              |
| SLUG-sh2-R2   | aattcaaaaaGCCAAATCATTTCAACTGAAActcgagTTTCAGTTGAAATGATTTGGC | shRNA              |
| Slc13a3-F1    | ctgacAGATCTccATGGCGGCGCTGGCGGCG                            | PCR                |
| Slc13a3-R1    | CTGACgaatTCAGAAGGTTTGAAGTGTGTTGTTGGTC                      | PCR                |
| Elovl7-F1     | ctgacGGATccATGGCGTTCAGTGATCTTACATCGAG                      | PCR                |
| Elovl7-R1     | CTGACgaattcTTAGTGGCGCTTGCTTTTGCAATTC                       | PCR                |
| Slc2a5-F1     | ctgacGGATccATGGAGGAAAAACATCAAGAGGAGACAG                    | PCR                |
| Slc2a5-R1     | CTGACgaattcCTACTGCTCCAAGATGGCGTGTG                         | PCR                |
| Gapdh-gF      | CTTTGGCATTGTGGAAGGGCTCAT                                   | PCR                |
| Gapdh-gR      | TGGAAGAGTGGGAGTTGCTGTTGA                                   | PCR                |
| Gadph-qF      | CCGCCTGGAGAAACCTGCCAAG                                     | PCR                |
| Gadph-qR      | TGCTGTAGCCGTATTCATTGTCATACCAG                              | PCR                |
| Hprt-qF       | CTCATGGACTGATTATGGACAGGAC                                  | PCR                |
| Hprt-qR       | GCAGGTCAGCAAAGAACTTATAGCC                                  | PCR                |
| GADPH-qF      | ATTGACCTCAACTACATGGTTTACATG                                | qPCR               |
| GADPH-qR      | TTGGAGGGATCTCGCTCCTGGAAG                                   | qPCR               |
| Tbgr1-qF      | CCAGAAGCTCAAACCTGTGTCAATTACC                               | qPCR               |
| Tbgr1-qR      | AGGTCCAGGGAGCCTGGC                                         | qPCR               |
| Erdr1-qF      | GGCACACACGGCAGGCAG                                         | qPCR               |
| Erdr1-qR      | TGACCGGTGGACGCTGAC                                         | qPCR               |
| Slc13a3-qF    | TCCTGGCAGAGCTGGCCATC                                       | qPCR               |
| Slc13a3-qR    | AGGCCCGTCCGCACCATG                                         | qPCR               |
| Elovl7-qF     | GGAGTCAAATTTGCTGCAGGTGG                                    | qPCR               |
| Elovl7-qR     | GATAGTGACAAGAACAACACTGGACAAGC                              | qPCR               |
| Slc2a5-qF     | AGCTGCTGAGAGAGCCCTC                                        | qPCR               |
| Slc2a5-qR     | GATCGGCGTAGTAGTAGATCGCG                                    | qPCR               |
| Slc13a3-gF    | GCTTGGGCTAAATAAGAGCCTGTCCCAAC                              | qPCR               |
| Slc13a3-gR    | CGCGCCTCCTTGGTCTGGACA                                      | PCR                |
| Slug-102qF    | GCGAACTGGACACACACACAGTTAT                                  | qPCR               |
| Slug-305qR    | GCTGCCGACGATGTCCATACAGTAAT                                 | qPCR               |
| Slc13a3-PrF   | tcgtGGTACcGACCAAACCTCAGGTCACCAGGCCTG                       | PCR                |
| Slc13a3-PrR   | tgcgAAGCTTAAGGGACGGGGAGGAGCCATG                            | PCR                |
| Slc13a3-gF2   | TTGTGGCATCTGTCACTGAGAAGG                                   | qPCR               |
| Slc13a3-gR2   | CACTCTGGACTCACGTGGGAAATG                                   | qPCR               |

**Supplemental Table 4. List of shRNAs used in the experiments**

| shNRA            | Supplier | Catalog number |
|------------------|----------|----------------|
| Slc13a3-shRNA #1 | Sigma    | TRCN0000070199 |
| Slc13a3-shRNA #2 | Sigma    | TRCN0000070200 |
| Slc13a3-shRNA #3 | Sigma    | TRCN0000070202 |
| Slc13a3-shRNA #4 | Sigma    | TRCN0000416004 |
|                  |          |                |
|                  |          |                |
|                  |          |                |
|                  |          |                |
|                  |          |                |

**Supplemental Table 5. Gene expression profiles from microarray data analysis**

| Gene Symbol<br>(or Genomic<br>Position) | Fold change (Slug <sup>+/+</sup> vs. Slug <sup>-/-</sup> ) | ANOVA p-value |
|-----------------------------------------|------------------------------------------------------------|---------------|
| Mgl2                                    | -6.06                                                      | 0.030505      |
| Mir101c                                 | -5.05                                                      | 0.047033      |
| H2afy                                   | -4.12                                                      | 0.00429       |
| Trim34a                                 | -2.93                                                      | 0.023388      |
| Far2                                    | -2.92                                                      | 0.019632      |
| C3                                      | -2.84                                                      | 0.034113      |
| Olf520                                  | -2.74                                                      | 0.039013      |
| Tlr7                                    | -2.72                                                      | 0.02704       |
| Mir3475                                 | -2.63                                                      | 0.035982      |
| Olf635                                  | -2.61                                                      | 0.001245      |
| Tcp10c                                  | -2.6                                                       | 0.026439      |
| Nrxn1                                   | -2.6                                                       | 0.040541      |
| Vmn1r149                                | -2.52                                                      | 0.005685      |
| Spr-ps1                                 | -2.49                                                      | 0.036899      |
| Igkv7-33                                | -2.48                                                      | 0.009524      |
| Dock1                                   | -2.42                                                      | 0.04346       |
| Ptgs1                                   | -2.4                                                       | 0.002979      |
| Gpr84                                   | -2.28                                                      | 0.048022      |
| Gtsf1l                                  | -2.28                                                      | 0.025892      |
| Tbrg1                                   | -2.28                                                      | 0.017372      |
| Tdg                                     | -2.25                                                      | 0.004892      |
| Olf1512                                 | -2.25                                                      | 0.023997      |
| Erdr1                                   | -2.25                                                      | 0.016088      |
| Rmnd5a                                  | -2.21                                                      | 0.017495      |
| Slc26a8                                 | -2.17                                                      | 0.049448      |
| Vmn1r53                                 | -2.17                                                      | 0.026967      |
| Lypd2                                   | -2.1                                                       | 0.02772       |
| Rnase13                                 | -2.08                                                      | 0.044722      |
| Slc13a3                                 | -2.08                                                      | 0.042847      |



|           |       |          |
|-----------|-------|----------|
| Mir133a-1 | -2.07 | 0.002533 |
| Lcn2      | -2.06 | 0.039996 |
| Cpne5     | -2.05 | 0.018697 |
| Mpo       | -2.04 | 0.018087 |
| Wap       | -2.02 | 0.031863 |
| Vegfa     | -2.01 | 0.046619 |
| Snord91a  | 2.03  | 0.010122 |
| Prg3      | 2.05  | 0.028375 |
| Hist1h4m  | 2.08  | 0.029673 |
| Ifi30     | 2.12  | 0.005741 |
| Slc13a3   | 2.27  | 0.025726 |
| Mir669a-2 | 2.28  | 0.044768 |
| Mir677    | 2.29  | 0.043818 |
| Depdc7    | 2.42  | 0.019115 |
| Slc2a5    | 2.43  | 0.027002 |
| Lpin2     | 2.47  | 0.00614  |
| Trim30d   | 2.49  | 0.042937 |
| Snord99   | 2.54  | 0.023828 |
| Elvol7    | 2.92  | 0.043205 |
| Cd2ap     | 3.12  | 0.028698 |
| Dach1     | 3.28  | 0.043827 |
| Aspa      | 5.42  | 0.03472  |

**Supplemental Table 6. List of antibodies**

| <b>Antibodies</b>                         | <b>Supplier</b>   | <b>Catalog number</b> |
|-------------------------------------------|-------------------|-----------------------|
| Mouse hematopoietic lineage biotin panel  | eBioscience       | 88-7774-75            |
| PE/Cy7 anti-mouse CD117(c-Kit)            | Biolegend         | 105814                |
| APC anti-mouse CD34 antibody              | Biolegend         | 128611                |
| APC/Cy7 anti-mouse CD16/32 antibody       | Biolegend         | 101327                |
| PerCP/Cy5.5 anti-mouse Ly-6G/Ly-6C (Gr-1) | Biolegend         | 108427                |
| Anti-Flag Tag Monoclonal antibody         | Thermo Scientific | MA1-91878             |
| PE Annexin V                              | Biolegend         | 640907                |
| Anti-SLC13A3 antibody                     | Sigma             | AV41439               |
